# Supplementary material for: Mutations in Drosophila Greatwall/Scant Reveal Its Roles in Mitosis and Meiosis and Interdependence with Polo Kinase
Source: PLOS journal article supplement (doi:10.1371/journal.pgen.0030200), 2007-11-05
Supplement: S2 (10.1371/journal.pgen.0030200.s002) [file journal.pgen.0030200.s002]

**Table S2.** **Progeny from *FM7/+* females with the indicated third-chromosome genotype crossed to *YSX.YL, v f B/0; C(4)RM, ci eyR/0* males.** Females tested are sibs of those in Table S1. *FM7/0* males are nearly always lethal.

Third No. Par. B/+, B/B Fem. + Males (y2 wa B/+ Fem.) v f B Males Prog./ Gametic

Genotype Females + ci ey + ci ey + ci ey + ci ey Female nullo-X nullo-4

*sr Scant/TM313* 4 7 0 7 0 (1) 0 0 0 3.8 0 0

*sr Scant/TM3126* 5[≥3] 6 1 18 1 (2) (1) 2 0 6.2 0.121 0.091

*mtrm13/+* 10 337 67 363 48 (104) (40) 171 8 113.8 0.271 0.130

4 93 21 89 18 (41) (9) 53 7 82.8 0.307 0.159

*mrm126/+* 7 208 18 184 13 (75) (15) 95 2 87.1 0.274 0.070

7 186 15 187 16 (80) (14) 57 6 80.1 0.202 0.091

*mtrm13/Scant* 5 56 2 54 4 (33) (5) 32 6 38.4 0.330 0.100

5 46 6 64 6 (35) (11) 28 8 40.8 0.300 0.162

*mtrm126/Scant* 3 37 4 47 0 (17) (5) 12 1 41.0 0.191 0.081

4 65 3 50 4 (47) (4) 28 6 51.8 0.282 0.095
