# Supplementary figures and images for: Mutations in Drosophila Greatwall/Scant Reveal Its Roles in Mitosis and Meiosis and Interdependence with Polo Kinase
Source: PLOS journal article supplement (doi:10.1371/journal.pgen.0030200), 2007-11-05

**mitotic  
cells/field**

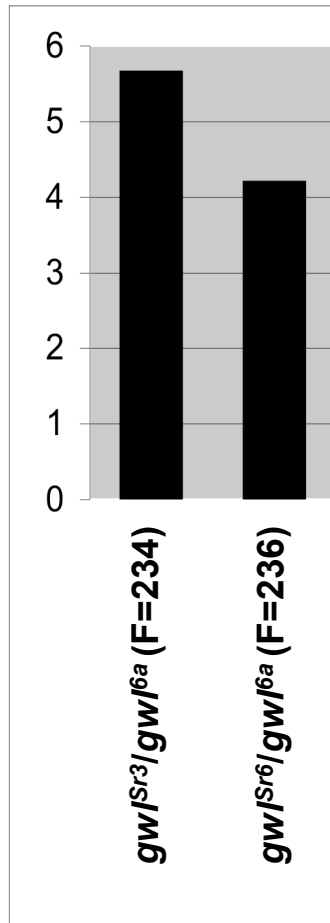

**M / A ratio**

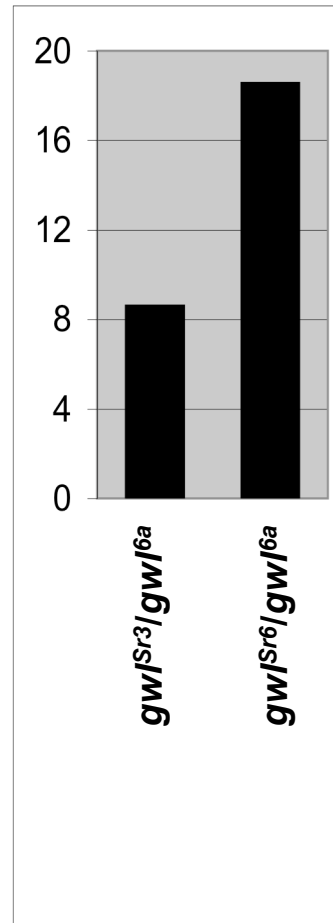

**% condensation  
defects**

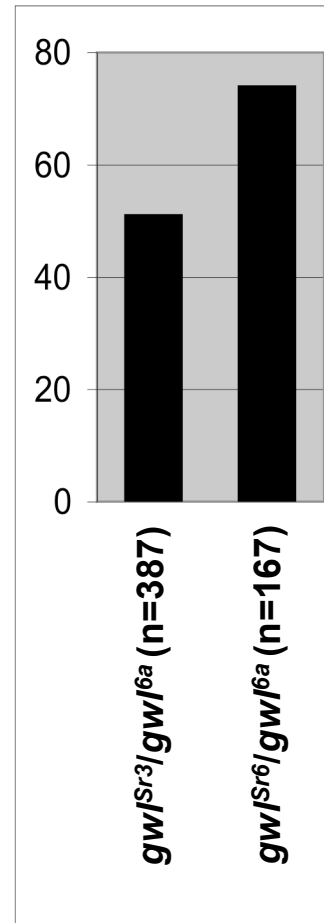

**% chromatin  
bridging**

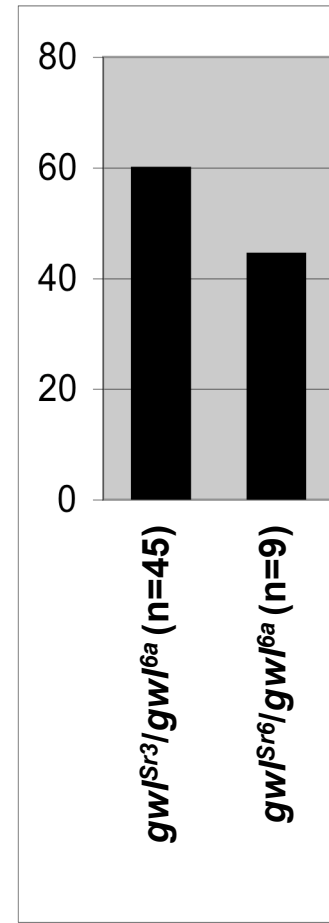

**% polyploidy**

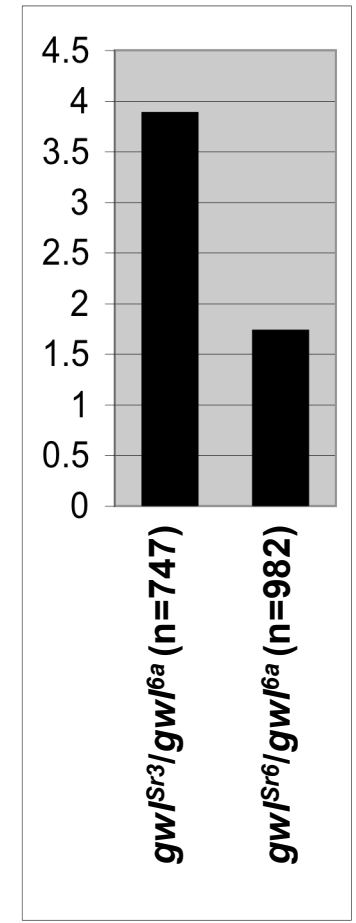

Supplement: S6 (10.1371/journal.pgen.0030200.s006) [file journal.pgen.0030200.sg006.PDF]
